# Supplementary material for: TSVdb: a web-tool for TCGA splicing variants analysis
Source: Springer Nature journal article supplement (doi:10.1186/s12864-018-4775-x), 2018-05-29
Supplement: 12864_2018_4775_MOESM1_ESM.pdf [file 12864_2018_4775_MOESM1_ESM.pdf]

# TSVdb: a web-tool for TCGA splicing variants analysis Supplementary material

## Contents

|   |                                                                               |   |
|---|-------------------------------------------------------------------------------|---|
| 1 | The clinical variable distribution                                            | 2 |
| 2 | The data download format                                                      | 3 |
| 3 | The query dialogs for choosing the tumor type                                 | 4 |
| 4 | The procedures for calculating the RAC1 exon usage in colon adenocarcinoma    | 5 |
| 5 | The RAC1 junction usage in colon adenocarcinoma using TSVdb                   | 6 |
| 6 | The Kaplan-Meier plots showing the associations for the RAC1 isoform uc003spw | 7 |

# 1 The clinical variable distribution

Table S1: The clinical variable distribution.

| Variable                   | Cancer type                                                                                                                                                                                   | n  |
|----------------------------|-----------------------------------------------------------------------------------------------------------------------------------------------------------------------------------------------|----|
| gender                     | PAAD; GBM; COAD; UVM; ACC; READ; THYM; KIRC; DLBC; STAD; LUSC; LAML; KICH; KIRP; BLCA; PCPG; THCA; LUAD; ESCA; LGG; SKCM; MESO; CHOL; LIHC; HNSC; SARC; BRCA                                  | 27 |
| race                       | PAAD; GBM; UCS; COAD; UVM; ACC; READ; OV; THYM; KIRC; DLBC; STAD; LUSC; LAML; CESC; KICH; KIRP; BLCA; PCPG; PRAD; THCA; LUAD; ESCA; LGG; SKCM; UCEC; MESO; BRCA; TGCT; CHOL; LIHC; HNSC; SARC | 33 |
| pr_receptor                | BRCA                                                                                                                                                                                          | 1  |
| number_pack_years_smoked   | LUSC; LUAD                                                                                                                                                                                    | 2  |
| location_in_lung           | LUSC                                                                                                                                                                                          | 1  |
| laterality                 | ACC; TGCT; HNSC                                                                                                                                                                               | 3  |
| h_pylori_infection         | STAD                                                                                                                                                                                          | 1  |
| gleason_stage              | PRAD                                                                                                                                                                                          | 1  |
| overall_survival           | PAAD; GBM; UCS; COAD; UVM; ACC; READ; OV; THYM; KIRC; DLBC; STAD; LUSC; LAML; CESC; KICH; KIRP; BLCA; PCPG; PRAD; THCA; LUAD; ESCA; LGG; SKCM; UCEC; MESO; BRCA; TGCT; CHOL; LIHC; HNSC; SARC | 33 |
| masaoka_stage              | THYM                                                                                                                                                                                          | 1  |
| family_history_of_cancer   | PAAD                                                                                                                                                                                          | 1  |
| fab_morphology             | LAML                                                                                                                                                                                          | 1  |
| er_receptor                | BRCA                                                                                                                                                                                          | 1  |
| asbestos_exposure          | MESO                                                                                                                                                                                          | 1  |
| tumor_tissue_site          | THYM                                                                                                                                                                                          | 1  |
| pathological_stage         | PAAD; COAD; UVM; ACC; READ; KIRC; STAD; LUSC; KICH; KIRP; BLCA; THCA; LUAD; ESCA; SKCM; MESO; BRCA; TGCT; CHOL; LIHC; HNSC                                                                    | 21 |
| grade                      | CEC; UCEC; LIHC                                                                                                                                                                               | 3  |
| clinical_stage             | UCS; UVM; OV; DLBC; ESCA; UCEC; HNSC                                                                                                                                                          | 7  |
| tumor_site                 | SKCM                                                                                                                                                                                          | 1  |
| smoking_history            | LUSC; CESC; ESCA                                                                                                                                                                              | 3  |
| risk_factor                | LIHC                                                                                                                                                                                          | 1  |
| reflux_history             | STAD                                                                                                                                                                                          | 1  |
| microsatellite_instability | COAD; READ; STAD                                                                                                                                                                              | 3  |
| history_of_colon_polyps    | COAD; READ                                                                                                                                                                                    | 2  |
| her2_receptor              | BRCA                                                                                                                                                                                          | 1  |
| alcohol_consumption        | ESCA; HNSC                                                                                                                                                                                    | 2  |
| number_of_pregnancies      | CEC; UCEC                                                                                                                                                                                     | 2  |
| menopause_status           | CEC; UCEC                                                                                                                                                                                     | 2  |
| kras_mutation              | LUSC; LUAD                                                                                                                                                                                    | 2  |
| histological_type          | COAD; READ; THYM                                                                                                                                                                              | 3  |

## 2 The data download format

Table S2: The data download format.

| Attribute                | Example               | Description                                                                                                                                                                               |
|--------------------------|-----------------------|-------------------------------------------------------------------------------------------------------------------------------------------------------------------------------------------|
| sampleID                 | “TCGA-3L-AA1B-01A”    | TCGA sample id.                                                                                                                                                                           |
| clinical_[clinical type] | “Primary Solid Tumor” | Clinical variables.                                                                                                                                                                       |
| os_time                  | 348                   | Overall survival time (day).                                                                                                                                                              |
| os_event                 | 0                     | Overall survival event (0=live, 1=death).                                                                                                                                                 |
| gene_[gene name]         | 100.1234              | Gene expression normalized read count.                                                                                                                                                    |
| isoform_[isoform id]     | 100.2345              | Isoform expression normalized read count.                                                                                                                                                 |
| exon/junction_[location] | 0.1102                | Exon/junction usage value. Exon/junction usage is calculated by dividing exon/junction quantification value to mean exon/junction quantification value of that person for a specific gene |

### 3 The query dialogs for choosing the tumor type

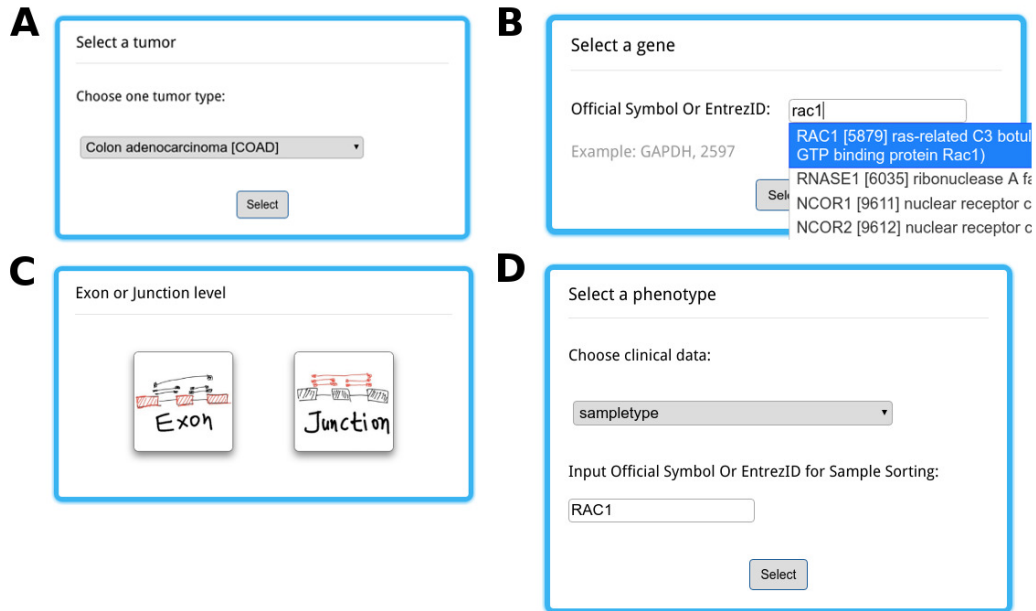

Figure S1: The query dialogs for choosing the tumor type (A), gene (B), exon/junction usage (C), phenotype and gene expression data that used to arrange samples in phenotype subgroups (D).

## 4 The procedures for calculating the RAC1 exon usage in colon adenocarcinoma

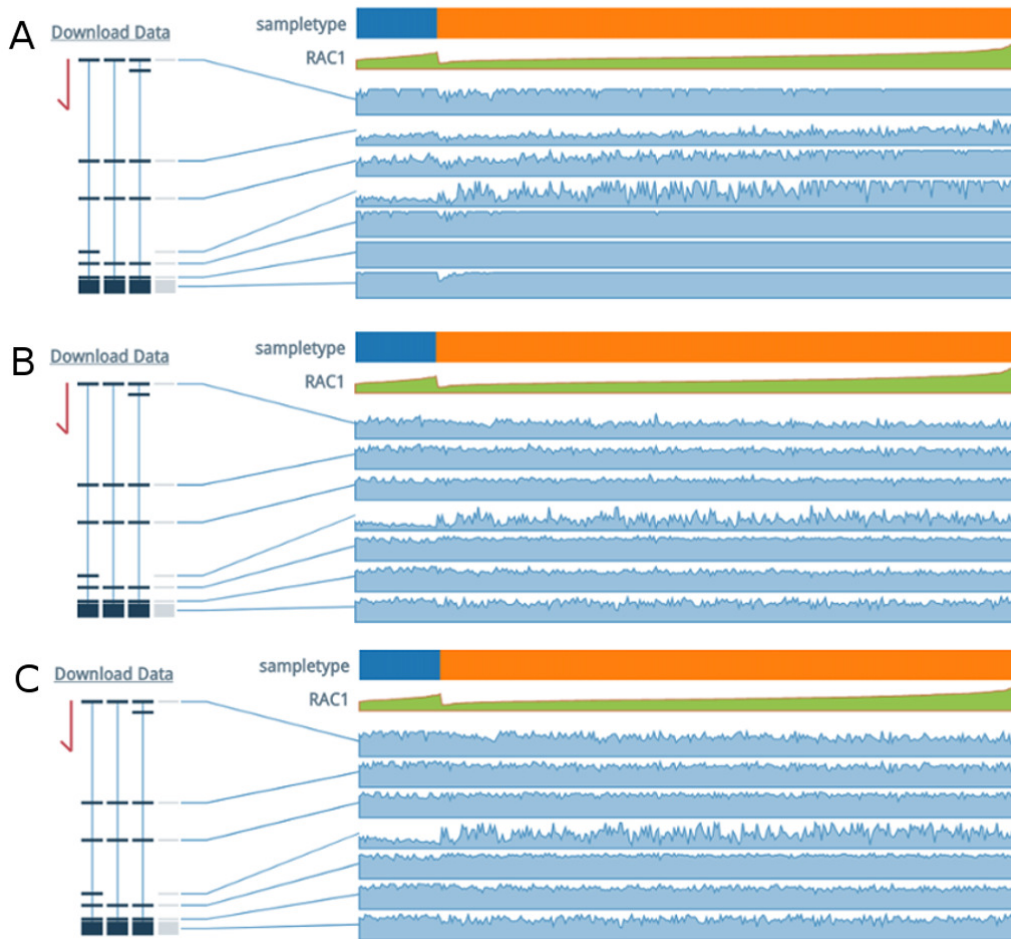

Figure S2: The procedures for calculating the RAC1 exon usage in colon adenocarcinoma. (A) Exon expression value (each peak represented for one sample value). (B) Exon usage value (the exon expression values were divided by gene expression). (C) The polished results of exon usage by diminishing the outlier effect.

## 5 The RAC1 junction usage in colon adenocarcinoma using TSVdb

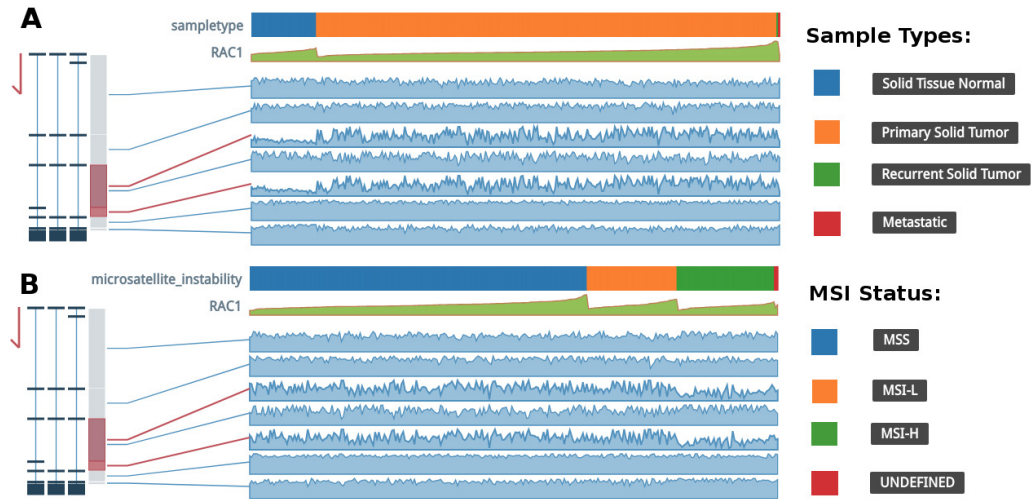

Figure S3: The RAC1 junction usage in colon adenocarcinoma using TSVdb. The different usage of junctions between sample types (A), and MSI status (B).

## 6 The Kaplan-Meier plots showing the associations for the RAC1 isoform uc003spw and uc003spx.3

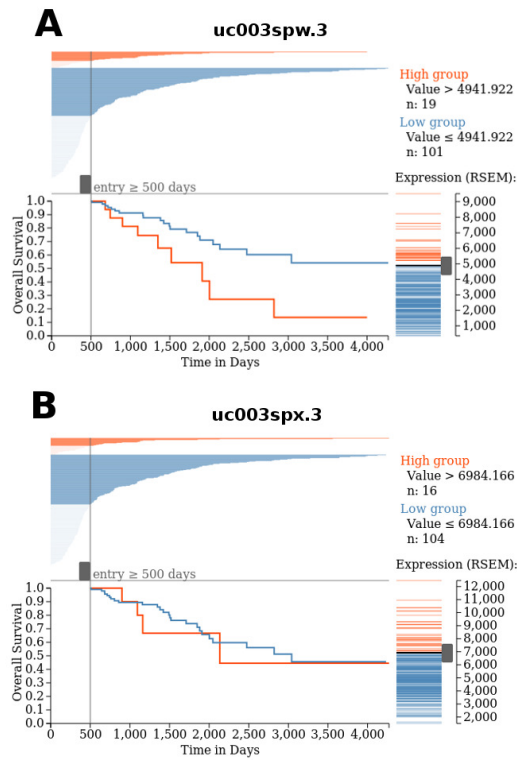

Figure S4: The Kaplan-Meier plots showing the associations for the RAC1 isoform uc003spw (A) and uc003spx.3(B) with patient overall survival after adjusting the onset.
